# Supplementary material for: Non-Pathogenic Mopeia Virus Induces More Robust Activation of Plasmacytoid Dendritic Cells than Lassa Virus
Source: PubMed Central journal article supplement (PMC6466290; doi:10.3390/v11030287), 2019-03-21

Figure S1

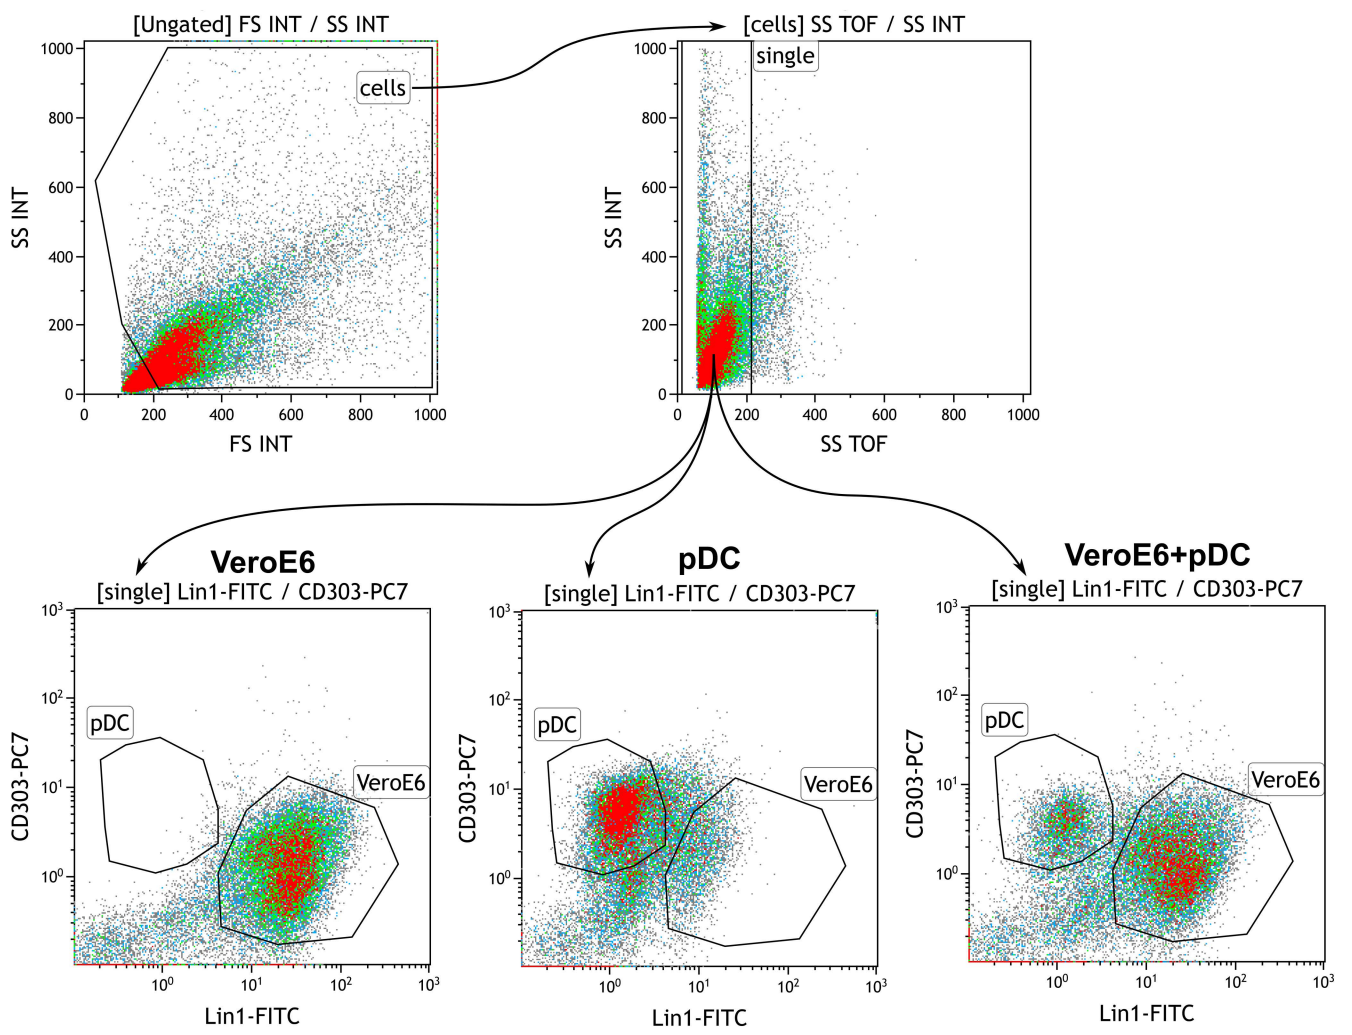

Figure S2

| Analytes       | No condition above threshold | Inside range but no significant differences | significant differences between at least 2 conditions |
|----------------|------------------------------|---------------------------------------------|-------------------------------------------------------|
| EGF            |                              | x                                           |                                                       |
| Eotaxin        |                              | x                                           |                                                       |
| FGF-2          | x                            |                                             |                                                       |
| Flt-3L         | x                            |                                             |                                                       |
| Fractalkine    | x                            |                                             |                                                       |
| G-CSF          |                              | x                                           |                                                       |
| GM-CSF         |                              | x                                           |                                                       |
| GRO            |                              | x                                           |                                                       |
| IFN $\alpha$ 2 |                              |                                             | x                                                     |
| IFN $\gamma$   |                              | x                                           |                                                       |
| IL-10          |                              | x                                           |                                                       |
| IL12-p40       |                              | x                                           |                                                       |
| IL12-p70       |                              | x                                           |                                                       |
| IL-13          | x                            |                                             |                                                       |
| IL-15          |                              |                                             | x                                                     |
| IL-17A         | x                            |                                             |                                                       |
| IL-1 $\alpha$  |                              | x                                           |                                                       |
| IL-1 $\beta$   |                              | x                                           |                                                       |
| IL-1RA         |                              | x                                           |                                                       |
| IL-2           | x                            |                                             |                                                       |
| IL-3           | x                            |                                             |                                                       |
| IL-4           | x                            |                                             |                                                       |
| IL-5           |                              | x                                           |                                                       |
| IL-6           |                              |                                             | x                                                     |
| IL-7           | x                            |                                             |                                                       |
| IL-8           |                              | x                                           |                                                       |
| IL-9           | x                            |                                             |                                                       |
| IP-10          |                              |                                             | x                                                     |
| MCP-1          |                              |                                             | x                                                     |
| MCP-3          |                              | x                                           |                                                       |
| MDC            |                              | x                                           |                                                       |
| MIP-1 $\alpha$ |                              | x                                           |                                                       |
| MIP-1 $\beta$  |                              |                                             | x                                                     |
| sCD40L         |                              | x                                           |                                                       |
| TGF $\alpha$   |                              | x                                           |                                                       |
| TNF $\alpha$   |                              |                                             | x                                                     |
| TNF $\beta$    |                              |                                             | x                                                     |
| VEGF           |                              | x                                           |                                                       |
| MPIF-1         |                              | x                                           |                                                       |
| BRAK           | x                            |                                             |                                                       |
| CXCL16         |                              | x                                           |                                                       |
| HCC-4          | x                            |                                             |                                                       |
| MIP-4          | x                            |                                             |                                                       |
| IL-34          |                              | x                                           |                                                       |
| IL-24          |                              | x                                           |                                                       |
| APRIL          |                              | x                                           |                                                       |
| IL-35          | x                            |                                             |                                                       |
| IL-37          | x                            |                                             |                                                       |
| IL-19          |                              | x                                           |                                                       |
| CCL28          | x                            |                                             |                                                       |
| HMGB1          | x                            |                                             |                                                       |
| IFN $\beta$    |                              |                                             | x                                                     |
| IL-38          | x                            |                                             |                                                       |
| IL28B          |                              | x                                           |                                                       |
| BAFF           | x                            |                                             |                                                       |
| IL-14          |                              | x                                           |                                                       |
| IL-36 $\beta$  | x                            |                                             |                                                       |
| IL32 $\alpha$  |                              | x                                           |                                                       |
| YKL40          | x                            |                                             |                                                       |
| IL-2           | x                            |                                             |                                                       |

Figure S3

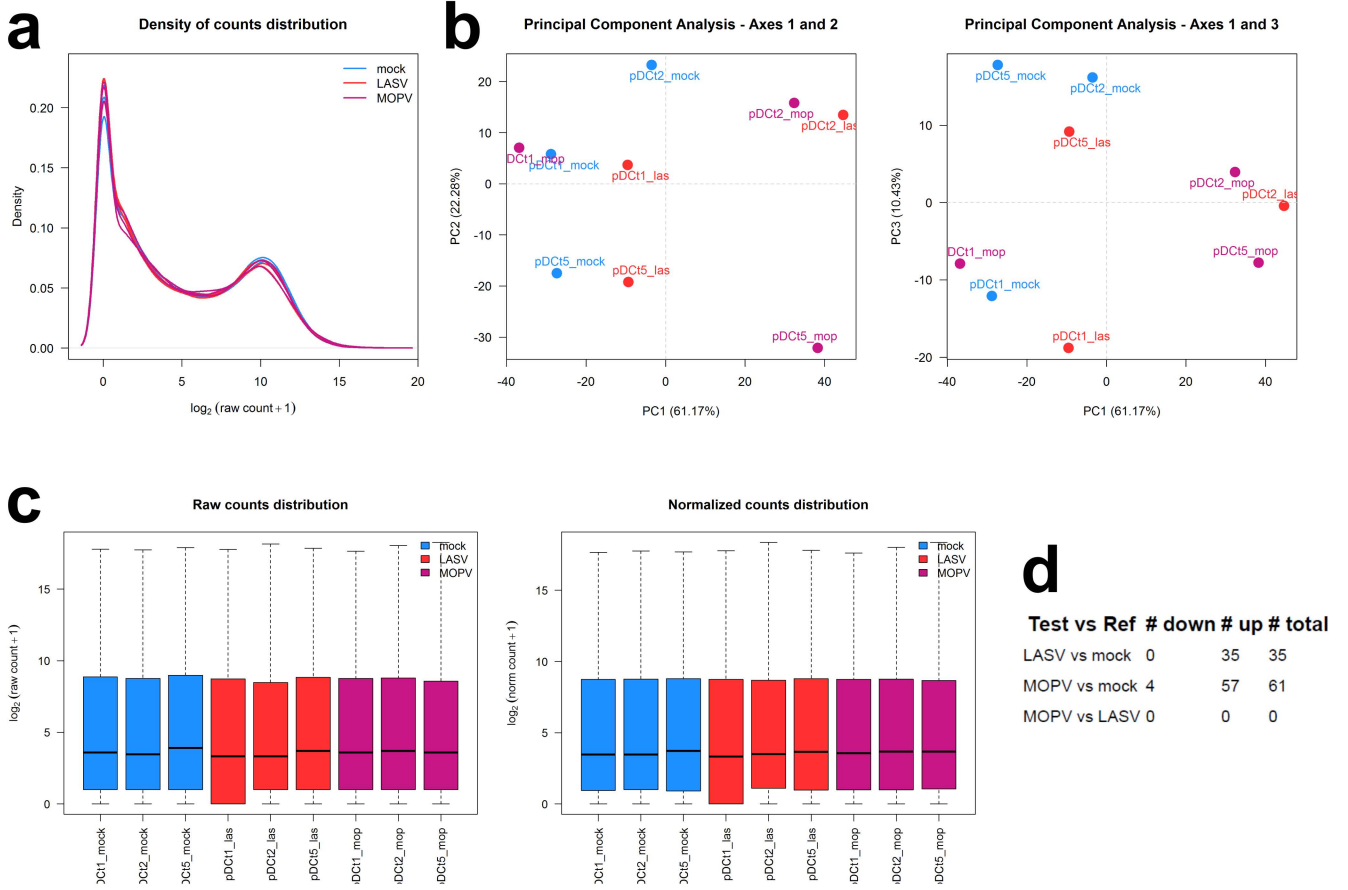

Supplement: viruses-11-00287-s001.pdf [file viruses-11-00287-s001.pdf]
